# Supplementary material
Source: publisher figshare collection journal article supplement (https://geolsoc.figshare.com/ndownloader/files/27996886)
Supplement: Supplementary file 1 [file 27996886]

— 340 —

Helmersen, G.P. 1872. Sir Roderick Impey Murchison: [Obituary]. Gorniy Zhurnal, 1872(2), 340–352. (In Russian). [Гельмерсен Г.П. Сэр Родерик Импей Мурчисон: [Некролог] // Горный журнал. 1872. № 2. С. 340–352.]

**Сэръ Родерикъ Импей Мурчисонъ.**

Статья академика Г. И. Гельмерсена, читанная въ торжественномъ заседании Академии Наукъ 29-го декабря 1871 г. —

11-го октября 1871 года, скончался въ Лондонѣ дѣйствительный членъ Академіи сэръ Родерикъ Импей *Мурчисонъ,* на восьмидесятомъ году своей жизни, которая съ такимъ блестящимъ успѣхомъ была посвящена наукѣ. Ученый міръ всѣхъ частей свѣта съ глубокимъ прискорбіемъ прочелъ вѣсть объ этой кончинѣ; но для насъ она еще особенно прискорбна потому, что ученая дѣятельность сэра Родерика имѣла близкое отношение къ Россіи. Исторію его жизни, которая вмѣстѣ съ тѣмъ будетъ поучительною исторіею и его научнаго развитія, мы ожидаемъ отъ его соотечественниковъ. Намъ же предстоитъ почетный долгъ съ глубокою благодарностью помянуть высокія заслуги покойнаго собственно передъ Россиею. Наше отечество утратило въ немъ одного изъ самыхъ ревностныхъ и преданныхъ друзей своихъ, наука — одного изъ своихъ замѣчательнѣйшихъ дѣятелей.

Сэръ Родерикъ Импей Мурчисонъ родился 19-го февраля 1792 г., въ Россширѣ, въ Тарраделѣ, именіи своего отца, мистера Кеннета Мурчисона, отъ брака его съ Барбарою Мекензи, старшею дочерью мистера Кеннета Мекензи. Первоначальное образованіе онъ получилъ въ Дургемской школѣ, откуда потомъ перешелъ въ королевское военное училище, въ Марло. Едва успѣлъ онъ достичь пятнадцатилѣтняго возраста, какъ пришлось ему взяться за оружіе, и прямо изъ школы идти въ походъ, въ Испанію, гдѣ въ то время герцогъ Веллингтонъ переносилъ побѣдоносное британское знамя сь одного поля сраженія на другое. Мурчисонъ сначала поступилъ въ 36-й пѣхотный полкъ, потомъ состоялъ при штабѣ своего дяди, генерала сэра Александра Мекензи, въ Сициліи, а наконецъ, въ капитанскомъ чинѣ, служилъ въ Инискелленскомъ 9-мъ драгунскомъ полку. Еще не исполнилось ему семнадцати лѣтъ, а онъ успелъ уже участвовать въ трехъ больших сраженіяхъ: при Ролисѣ, Виміерѣ, где онъ несъ полковое знамя, и при Коруньѣ.

— 341 —

Въ 1815 году онъ покинулъ военную службу и женился на Шарлотѣ Гюгонин, единственной дочери генерала Гюгонина. Этотъ бракъ имелъ решительное вліяніе на всю дальнѣйшую судьбу его жизни.

Леди Мурчисонъ была женщина необыкновенная, и ученый міръ обязанъ ей глубокою благодарностью. Еслибъ она, какъ говорить Франкъ Буклэндъ въ некрологѣ этой замѣчальной женщины, не отвлекла пятьдесятъ лѣтъ тому назадъ могучій умъ своего мужа отъ простыхъ занятій отставнаго драгунскаго капитана и не направила его на поприще науки, Англіи не довелось бы гордиться знаменитымъ баронетомъ, который съ такою неутомимою энергіею трудился на пользу геологии, и благодаря которому открытія Англіи въ этой наукѣ славятся повсюду, и ими пользуется человѣкъ вездѣ, где существуетъ цивилизація и где промышленность разработываетъ ископаемыя богатства почвы.

Въ молодыхъ лѣтахъ, когда дарованія сэра Родерика начали развиваться, леди Мурчисонъ всюду сопровождала своего мужа, вооруженная молоткомъ, записною или рисовальною книжкою; она была неотлучно при немъ въ его ученыхъ путешествияхъ по берегамъ Англіи, на Альпахъ, въ Италіи, въ Германіи; она не оставляла его и въ мирномъ кабинетѣ, гдѣ онъ оканчивалъ свое обширное сочиненіе о Силурійской системѣ. Это была женщина не только обладавшая обширными энциклопедическими свѣдѣніями по разнымъ отраслямъ знанія, но и спеціально ученая по конхиліологіи; кромѣ того она отличалась замѣчательнымъ талантомъ въ рисованіи. Многіе изъ рисунковъ, украшающихъ сочиненія ея мужа, принадлежать ея карандашу; между прочимъ наука обязана ей вѣрнымъ изображеніемъ открытаго въ Швейцаріи и столь

— 342 —

прославленнаго впослѣдствіи скелета ископаемой лисицы — тѣмъ самымъ изображеніемъ, которое дало возможность Кювье опредѣлить это животное. Впоследствіи она была для мужа утѣшительницею и совѣтницею, поддерживая и ободряя его въ той тяжелой борьбѣ, которую пришлось ему испытать для того, чтобы остоять новыя воззрѣнія, вводимыя имъ въ геологію. Внѣшнему міpy мало было извѣстно о тѣхъ трудностяхъ, препятствіяхъ и колебаніяхъ которыя приходилось выдерживать молодому ученому, и въ преодолѣніи которыхъ ему помогала его подруга. Глубоко должны мы чтить, восклицаетъ Буклэндъ, жену человѣка, вознесшагося на такую высоту въ ученомъ міpѣ, такъ какъ ей принадлежитъ весьма существенная доля въ томъ, что совершено имъ.

И такъ, леди Мурчисопъ удалось отвлечь своего молодаго супруга съ полей битвы и отъ военныхъ почестей къ мирной дѣятельности на ученомъ поприщѣ. Послѣ нѣсколькихъ лѣтъ пребыванія Мурчисона на Европейскомъ материкѣ, мы находимъ его, въ 1822 г., въ Лондоне, гдѣ онъ, по совѣту сэра Гумфри Деви, усердно посѣщаетъ лекціи физическихъ наукъ въ Royal Institution; а немного лѣтъ спустя, видимъ его занятымъ геологическими изслѣдованіями на югѣ Англіи. Въ 1825 г. онъ представилъ въ Лондонское географическое общество, котораго состоялъ членомъ, разсужденіе о геологическомъ строеніи сѣверозападной части Суссекса и прилегающихъ частей Гэмпшира и Суррея. Въ 1826 г. онъ изслѣдовалъ каменноугольный залежи въ Сутерлэндширѣ, при чемъ удостовѣрился, что онѣ принадлежать къ юрской формаціи; потомъ, въ 1827 г., въ сопровожденіи одного изъ своихъ старѣйшихъ друзей, пастора Адама Седжвика, профессора геологіи въ Кембриджѣ, онъ отправился въ Шотландския горы, а въ 1828 г. вмѣстѣ съ сэромъ Чарльзомъ Лайелемъ, обозрелъ потyxшіе волканы Оверни и третичныя формаціи южной Франціи. Оба ученые представили тогда важныя объясненія относительно образованія долинъ отъ вымывовъ. После того Мурчисонь изслѣдовалъ Австрійскія и Баварскія Альпы и результаты этого изслѣдованія издалъ вмѣстѣ съ Седжвикомъ въ 1829 и 1830 годахъ.

Такимъ образомъ мы видимъ Мурчисона, уже при самомъ началѣ его ученой дѣятельности, сотрудникомъ наиболѣе выдающихся ученыхъ Англіи, къ числу которыхъ принадлежалъ и Буклэндъ. Седжвикъ, Буклэндъ и самъ Мурчисонъ заметили весьма важный пробѣль въ системѣ геологіи, а именно недостаточность изученія и, вслѣдствіе того, шаткость и нѣкоторую сбивчивость класификаціи и послѣдовательности такъ называемыхъ палеозойскихъ формацій, то есть, тѣхъ осадочныхъ формацій, которыя занимаютъ мѣсто между кристалическими сланцами и тріасовою почвою. Вліянію Буклэнда должно, повидимому, приписать то

— 343 —

обстоятельство, что Мурчисонъ и Седжвикъ посвятили себя изученію этихъ формацій сперва въ своемъ отечествѣ, а именно въ Южномъ Уэльсѣ, Гирфордширѣ и Шропширѣ, а потомъ въ Бельгіи и Прирейнской области. Плодомъ этого изучения было нѣсколько класическихъ сочиненій: Силурійская система, великолѣпный трудъ одного Мурчисона, явившійся въ свѣтъ въ 1839 г., и два другія сочиненія, написанныя имъ въ товариществѣ въ Седжвикомъ. Изъ этихъ послѣднихъ, одно издано въ 1837 г. и имѣетъ предметомъ геологію Девоншира, а именно составь и дѣленіе палеозойскаго образованія названной области, откуда было заимствовано и названіе девонской системы. Другое сочиненіе, напечатанное въ 1842 г., познакомило насъ съ составомъ, распространеніемъ и класификаціею палеозойскихъ фармацій сѣверной Германіи и Бельгіи.

Эти три сочиненія, вмѣстѣ съ сочиненіемъ извѣстнаго англійскаго палеонтолога Филлипса о древнихъ формаціяхъ Великобританіи проложили новый путь въ системѣ геологіи. Въ самомъ обширномъ объемѣ и самымъ основательнымъ образомъ они до казали, что совокупность пластовъ, называвшаяся въ прежнее время переходною или сѣровакковою формаціею, распадается на два рѣзко различавшаяся между собою образованія, изъ которыхъ нижнее Мурчисонъ назвалъ силурійскою системою, а непосредственно за нимъ следующее верхнее - девонскою системою. Столь же рѣзко отделилась девонская система отъ лежащей на ней каменноугольной формаціи, за нижній ярусъ которой былъ признанъ горный известнякъ.

Такимъ образомъ, была навсегда устранена шаткость, существовавшая дотолѣ въ этой области: яркій свѣтъ разсѣялъ тьму, познанію и изслѣдованію названныхъ формацій было положено прочное основаніе. Успѣхъ былъ необыкновенный. Геологи Европейскаго материка, каждый въ своемъ отечествѣ, немедленно принялись за переизслѣдованіе палеозойской области. Въ Россіи, если уже и прежде были люди, пріобрѣтшіе себѣ заслуженную извѣстность изученіемъ древнѣйшихъ осадочныхъ формацій, то сочиненія Мурчисона послужили и для нихъ путеводною нитью въ дальнѣйшихъ трудахъ. Въ самомъ Мурчисонь зародилось желанie обозрѣть обширныя

— 344 —

палеозойскія области Европейскаго материка и въ нихъ искать провѣрки и подтвержденія тѣмъ дѣленіямъ и той послѣдовательности формацій, которыя были имъ замѣчены въ Англіи, Бельгіи и Прирейнскомъ краѣ. Никакая другая страна не представлялась въ такой степени удобною для этой цѣли, какъ Европейская Россія. Хотя въ ту пору геологическое строеніе ея было еще недостаточно изслѣдовано, однако, изъ предшествовавшихъ работъ Странгвейса, Эйхвальда, Пандера и Густава Розе, а также изъ сочиненія Леопольда фонъ Буха: «Матеріалы къ опрѣделенію горныхъ формацій Россіи», уже было извѣстно, что палеозойскія формаціи въ нашемъ отечествѣ занимаютъ площадь громаднаго протяженія. Въ особенности труды Пандера и Буха возбуждали въ Мурчисоне желаніе посѣтить Poccію, такъ какъ изъ нихъ онъ убѣдился несомнѣннымъ образомъ въ томъ, что на сѣверѣ Россіи должны оказаться системы, соответствующiя силурійской и девонской системамъ Великобританіи.

Окончательно рѣшившись предпринять путешествіе въ Poccію, сэръ Родерикъ сообщилъ о своемъ намѣреніи Россійскому послу при Лондонскомъ дворѣ, барону Бруннову, и чрезъ ходатайство этого сановника, всегда готоваго содѣйствовать успѣхамъ науки, получилъ отъ нашего правительства не только coглacіe на задуманное имъ прeдпpіятіe, но и содѣйствіе оному.

Мурчисонъ собственно былъ не палеонтологъ; спеціальную область его занятій и изслѣдованій составляли преимущественно стратиграфія и ученіе о послѣдовательности формацій. Поэтому, во всѣхъ своихъ ученыхъ путешествіяхъ, онъ приглашалъ себѣ въ спутники спеціалиста-палеонтолога. На этотъ разъ выборъ его паль на г. Вернейля, уже и прежде сопровождавшего его при изслѣдованіяхъ въ Бельгіи.

Въ началѣ лѣта 1840 года, оба путешественника явились въ Петербургъ, куда еще до ихъ прибытія съѣхались баронъ Александръ Мейендорфъ, графъ Александръ Кейзерлингъ и ганновepcкий профессоръ Блазиусъ, которымъ было поручено нашимъ правительствомъ произвести нѣкоторыя изслѣдованія въ Poссии по части естественной исторіи и статистики.

— 345 —

Бывшій министръ финансовъ, графъ Канкринъ, и тогдашній начальникъ корпуса горныхъ инженеров, К. В. Чевкинъ, поддержали путешественниковъ самымъ дѣятельнымъ покровительствомъ своимъ. Повсюду были разосланы предписанія о томъ, чтобы имъ было оказываемо всякое содѣйствіе, въ какомъ они могли нуждаться для достиженія своей цели. Нашъ почтенный сочленъ, тогда еще только поручикъ корпуса горныхъ инженеровъ, Н. И. Кокшаровъ, былъ назначенъ сопровождать Мурчисона.

Изслѣдовавъ сперва окрестности Петербурга, экспедиція направилась на сѣверъ, чрезъ Вытегру, въ Архангельскъ, оттуда — на Ярославль и Кострому, въ Москву и Нижній-Новгородъ; потомъ спустилась по Волгѣ до Юрьевца, и наконецъ, чрезъ Рязань, Коломну и Москву, возвратилась въ С.-Петербургъ.

Въ этомъ первомъ путешествіи, членамъ экспедиціи нѣсколько разъ приходилось разъѣзжаться въ разныя стороны и снова съѣзжаться, такъ какъ различіе цѣлей препятствовало имъ слѣдовать постоянно всѣмъ вмѣстѣ; графъ Кейзерлингъ присоединялся попеременно то къ той, то къ другой партіи. Хотя это первое путешествіе уже привело къ весьма важнымъ результатами хотя Эйхвальдъ нанечаталъ свое сочиненіе о силурійской системѣ Эстляндіи, а Дюбуа-де-Монпере геологическое описаніе Крыма, Кавказа, Волыни и Подоліи, хотя ожидалось предпринятое Густавомъ Розе обнародованіе результатовъ путешествія Гумбольдта, и кроме того существовало уже нѣсколько замѣчательныхъ геологическихъ работъ русскихъ горныхъ офицеровъ и даже была составлена небольшая общая геологическая карта Европейской Россіи, — однако, въ произведенныхъ изслѣдованіяхъ, очевидно недоставало еще слишкомъ многаго для того, чтобы построить общую геологическую картину Россіи на болѣе прочныхъ основаніяхъ, чемъ прежнія. Въ этомъ убѣжденіи, граф Канкринъ испросилъ соизволеніе Государя Императора на то, чтобы пригласить сэра Родерика Мурчисона и г. Вернейля предпринять второе ученое путешествіе по Россіи. Графъ Кейзерлингъ, родомъ изъ Курляндіи, вступилъ между тѣмъ въ государственную службу. Онъ присоединился къ путешественникамъ, для сопровожденія которыхъ былъ опять назначенъ поручикъ Кокшаровъ.

— 346 —

Объѣхавъ, въ сопровожденіи графа Кейзерлинга, сначала губерніи: Виленскую, Курляндскую, Лифляндскую и Эстляндскую, побывавъ затѣмъ въ Петербурге, гдѣ они имели счастie представиться Государю Императору и удостоились самаго милостиваго пpіeмa, Мурчисонъ и Вернейлъ, вмѣстѣ съ прочими членами экспедиціи, отправились сперва въ Тульскую и Калужскую губерніи для осмотра простирающейся въ нихъ каменноугольной формаціи, а за тѣмъ на Уралъ, въ Оренбургъ, въ Киргизскую степь, къ горе Богдо, въ степи Астраханскихъ Калмыковъ, къ низовью Волги и, наконецъ, въ Донецкій каменноугольный кряжъ. На обратномъ пути были ими изслѣдованы губерніи: Харьковская, Курская, Орловская и долина Дона около Воронежа. На этотъ разъ члены экспедиціи также раздѣлили между собою труды, потому что только такимъ образомъ и при деятельной помощи К. В. Чевкина, оказалось возможнымъ, въ такое короткое время, достичь тѣхъ важныхъ результатовъ, которые это пyтeшecтвіe доставило наукѣ и нашему отечеству.

Прежде, чѣмъ мы попытаемся въ краткомъ очеркѣ изложить эти результаты, слѣдуетъ упомянуть, что Мурчисонъ, для того, чтобы имѣть возможность сравнить геологическое строеніе Poccіи со строеніемъ смежныхъ съ нею странъ, объѣздилъ въ 1842 году значительную часть Германіи, Польшу и Карпатскія горы, а въ 1843 г., Швецію и Норвегію; графъ же Кейзерлингъ, летомъ 1843 г., вмѣстѣ съ флотскимъ офицеромъ П. Крузенштерномъ, изследовалъ Печорскій край, до котораго экспедиція 1840 года не достигала.

Послѣ того, какъ результаты этихъ путешествій были представлены, въ нѣсколькихъ предварительныхъ отчетахъ, Лондонскому геологическому обществу, мы пршбрели, въ 1845 г., монументальное сочиненіе: «The Geology of Russia in Europe and the Ural Mountains». Первая часть его нринадлежитъ самому Мурчисону; вторая часть, посвященная палеонтологическимъ изслѣдованіямъ, была составлена Вернейлемъ, Кейзерлитомъ и извѣстнымь французскимъ палеонтологомъ Альсидомъ д'Орбинъи.

Точно такъ же, какъ прежде «Силурійская система» Мурчисона проложила новый путь для изученія палеозойскихъ формацій на всемъ земномъ шарѣ, такъ «Geology of Russia» нашихъ трехъ знаменитыхъ путешественниковъ сдѣлала переворотъ въ геологическихъ изслѣдованіяхъ Россіи. Постараемся въ краткихъ словахъ охарактеризовать значеніе этого сочиненія.

— 347 —

Геологическое строеніе Россіи, бывшее до того времени извѣстнымъ болѣе или менѣе отрывочно, и графическое изображеніе котораго было, въ видѣ опыта, набросано на двухъ небольшихъ картахъ, явилось въ названной книгѣ опредѣленнымъ твердыми и ясными чертами. Отдѣльный наблюденія, произведенныя съ рѣдкою проницательностью тремя геологами-путешественниками, а равно критически провѣренныя и исправленныя работы нѣкоторыхъ изъ ихъ предшественниковъ, были сгрупированы вмѣстѣ, причемъ каждой группѣ отведено действительно принадлежащее ей место, и всѣ онѣ были, со свойственнымъ Мурчисону мастерствомъ, соединены въ одну цѣльную геологическую картину страны.

Хотя приложенная къ книгѣ геологическая карта, заключавшая въ себѣ не одинъ только Уралъ, но и Кавказъ, Арало-Каспійскую низменность и все прибрежье Чернаго моря, представляла весьма мало подробностей, темъ не менѣе, разсматривая ее, можно было совершенно уяснить себѣ распредѣленіе и вѣроятныя границы отдѣльныхъ формацій. Входящіе въ составъ каждой формаціи члены представлены очень наглядно и мѣтко въ двухъ, помещенныхъ по бокамъ карты, идеальныхъ профиляхъ, которымъ немало придаетъ цены еще и то, что при каждомъ ярусѣ каждой формаціи выставлены имена характеризующихъ его раковинъ и название мѣстности, гдѣ можно наблюдать ихъ. Стоитъ только отыскать въ текстѣ и въ прекрасныхъ виньеткахъ перваго тома литологическія и стратиграфическія условія каждой мѣстности, а во второмъ томѣ изображенія окаменѣлостей— и такимъ образомъ, не выходя изъ кабинета, можно совершить весьма поучительное путешествіе по всей Россіи.

Какъ зоологи и ботаники въ своихъ изслѣдованіяхъ по настоящее время опираются на Палласа, такь точно геологамъ и палеонтологамъ Россіи придется еще долго справляться съ великолѣпнымъ сочиненіемъ сэра Родерика.

— 348 —

Во-первыхъ, изъ него мы узнали тотъ новый фактъ, что даже на крайнемъ сѣверѣ, въ Двинскомъ низовьѣ и въ Печорскомъ краѣ, встрѣчаются постпліоценовые пласты съ хорошо сохранившимися створками раковинъ, по настоящее время живущихъ еще въ сѣверныхъ моряхъ. Изъ него же мы почерпнули свѣденія, что новыя третичныя напластованія Аральско-Каспіиской и Черноморской низменностей распадаются на два отдѣла, которые весьма удачно названы древнѣйшими и позднѣйшими каспійскими. Въ низовьѣ Волги находимъ мы древнѣйшія третичныя образованія.

Во-вторыхь, то, что еще прежде угадываль Леонольдъ фонъ Бухъ, а именно, что въ сѣверной половинѣ Россіи не существуетъ представителей мѣловаго періода, было вполне подтверждено Мурчисоновою «Геологію Россіи».

Въ-третьихъ, юрская формація, которая до того времени было извѣстна только въ небольшихъ, спорадически-разсѣянныхъ котловинахъ, вдругъ предстала огромными сплошными поясами и площадями между среднимъ теченіемъ Волги и Тиманскимъ горнымъ кряжемъ, между этимъ кряжемъ и западнымъ подножіемъ Урала, и на сѣверно-восточной окраинѣ Каспійской низменности.

Въ-четвертыхъ, Мурчисонъ еще прежде призналъ, что пестрый песчаникъ, на который до тѣхъ поръ смотрѣли, какъ на нижній ярусъ тріаса, следуетъ отделить отъ него и отнести къ періоду цехштейна, считая его верхнимъ ярусомъ послѣдняго. Когда онъ увидѣлъ, что это новое возреніе подтверждается громадною формаціею, занимающею почти всю восточную половину Россіи и содержащею, у подножія Урала, мѣдныя руды, а далѣе на западъ соленые ключи и каменную соль, то онъ назвалъ эту формацію «пермскою», на томъ основаніи, что ни въ какой другой мѣстности эта формація не встрѣчается въ такомъ громадномъ развитіи, какъ въ древней Біарміи. Здѣсь кстати будетъ замѣтить, что верхнюю часть этой формаціи, вслѣдствіе ея большаго сходства въ литологическомъ отношеніи съ девонскою системою Россіи, Мурчисонъ первонально принималъ за эту послѣднюю; но по более точномъ изслѣдованіи, онъ согласился съ своимъ молодымъ спутникомъ, Кокшаровымъ, опровергавшимъ это заключеніе, такъ какъ ему уже было извѣстно гораздо позднѣйшее происхожденіе большой восточной формаціи.

— 349 —

Въ-пятыхъ, чрезвычайно важна была, даже въ практическомъ отношеніи, а именно по примененіи къ горному дѣлу, та часть Мурчисонова сочиненія, въ которой идетъ рѣчь о каменноугольной формаціи средней Россіи. Мурчисонъ и его спутники нашли, что эта формація распадается на два главные яруса, изъ которыхъ верхній никогда не заключаетъ въ себѣ каменноугольныхъ пластовъ, а нижній, содержащій каменный уголь, лежитъ непосредственно на девонскихъ пластахъ. Каждый изъ этихъ отдѣловъ такъ характеристично отличается и сопровождающими его раковинами, и литологическими условіями, что смешивать ихъ между собою невозможно. Этимъ былъ прочно опредѣленъ геологическій горизонтъ, въ которомъ надлежало искать каменный уголь въ средней Россіи, и безошибочная вѣрность указанія Мурчисона въ этомъ отношеніи подтвердилась въ сотняхъ пунктовъ. Кромѣ того, Мурчисонъ уже тогда высказывался въ пользу пригодности этихъ каменныхъ углей для употребленія.

Въ-шестыхъ, весьма важный результатъ дало также изученіе девонскихъ пластовъ Россіи, ибо только посредствомъ его Мурчисонъ могъ удостовѣриться, что пoнятіe о составе этой системы, которое онъ вывелъ изъ своихъ изслѣдованій въ Англіи и въ Шотландіи, и которое оспаривалось некоторыми геологами, напримеръ Фердинандомъ Ремеромъ, было единственное действительно вѣрное.

Вь-седьмыхъ, изслѣдованіе нижнихъ силурійскихъ пластовъ Естляндии вполне подтвердило прежнее предположеніе, которое Мурчисонъ особенно отстаивалъ, что эти пласты содержать въ себѣ остатки первыхъ, а слѣдовательно древнѣйшихъ жівотныхъ, обитавшихъ на земномъ шарѣ.

Въ-восьмыхъ, извѣстный дотолѣ только но имени Тиманскій кряжъ на западной окраине Печорской низменности былъ изслѣдованъ графомъ Кейзерлингомъ, и это изслѣдованіе вполнѣ удовлетворительно опрѣделило его направленіе, протяженіе и геологическое строеніе, такъ что означенная мѣстность, съ ея палеонтологическими особенностями, составляетъ теперь особый типъ въ геологіи Россіи.

Боясь переступить за границы краткой бесѣды, довольствуемся перечисленіемъ этихъ главныхъ результатовъ. Замѣтимъ только еще разъ, что «Geology of Russia» Мурчисона открыла новый путь наукѣ; она стала исходною точкою и путеводною нитью для многихъ позднѣйшихъ работъ нашихъ отечественных геологовъ.

— 350 —

Кь сожалѣнію, нельзя не сознаться, что въ теченіе двадцатипяти летъ мы не воспользовались примѣром, который подалъ намъ Мурчисонъ, и не подвинули впередъ задачи, оставленной имъ для насъ. Общую геологическую картину Россіи, подаренную намъ великимъ англійскимъ ученымъ, мы дополнили лишь въ немногихъ отдѣльныхъ частяхъ. Такія громадныя пространства нашего отечества, каковы Пермская котловина, обширная третичная область Арало-Каспійской низменности, каменноугольная формація южной Россіи, почти всѣ западныя губерніи цѣликомъ, уже двадцать пять лѣтъ напрасно ожидаютъ исполненія этой настоятельной задачи, съ которою связано столько интересовъ Poccіи. Впрочемъ, разрешенія ея нельзя ожидать отъ отдѣльныхъ лицъ или отъ случайныхъ предприятій; трудъ этотъ можетъ осуществить только государственное геологическое учрежденіе, трудящееся по определенному и обдуманному плану, такое учрежденіе, какія существуют въ каждой образованной стране Европы, какими обладаютъ и Соединенные Штаты Сѣверной Америки и Британская Индія.

«Geology of Russia» не единственное сочиненіе Мурчисона , которымъ авторъ принесъ пользу для геологіи Россіи. Другое его сочиненіе, озаглавленное «Siluria», явившееся въ свѣтъ въ 1859 году и недавно напечатанное новымъ изданіемъ, посвящено изслѣдованію палеозойскихъ формацій Европейскаго материка и Сѣверной Америки и можетъ считаться образцомъ сравнительной геологіи! Въ этомъ сочиненіи особенно важна для насъ характеристика древнихъ формацій Россіи и Уральскихъ золотоносныхъ розсыпей.

Мы старались вкратцѣ исчислить заслуги Мурчисона относительно изученія Россіи, но назвавъ его, въ самомъ началѣ своей речи, ревностнымъ и преданнымъ другомъ нашего отечества, мы имели въ виду не одно то обстоятельство, что онъ съ такою любовью посвятилъ Poccіи свою ученую дѣятельность, а разумѣли также и его искреннее сочувствіе къ ея обитателямъ.

Свое благоговѣніе къ Императору Николаю Павловичу и къ Его Августѣйшему Наслѣднику, онъ не разъ высказывал и

— 351 —

публично, и въ кругу друзей своихъ, съ живѣйшею благодарностью вспоминая истинно Монаршій, и во всѣхъ отношешяхъ лестный приемъ, которымъ его удостоивалп оба Государя. Ему дороги были и внѣшніе знаки этого Монаршаго благоволенія, безъ которыхъ онъ никогда не являлся въ тѣхъ случаяхъ, когда въ Лондонѣ, въ торжественныхъ собраніяхъ, приходилось ему привѣтствовать членовъ Русской Императорской Фамиліи или другихъ знатныхъ Русскихъ. И какой радушный пріемъ всегда встрѣчали русскіе друзья и знакомые Мурчисона, когда, пріѣзжая въ Лондонъ, являлись въ гостепріемный домъ подъ No 16 на Бельгревъ-скверѣ! Письма Мурчисона къ его друзьямъ на дальнемъ востокѣ полны краснорѣчивыхъ изъявленій непоколебимой и неизмѣнной любви къ нашей странѣ и къ народу и искренней преданности имъ.

Что эти чувства были непритворны — тому мы имѣемъ много самыхъ убѣдительныхъ доказательствъ. Во время восточной войны, сэръ Родерикъ сталъ во главѣ немногихъ Англичанъ, которые имѣли мужество въ своемъ отечествѣ публично завести рѣчь въ пользу Россіи и противъ войны съ нею. Если въ этомъ случаѣ его голосъ не былъ уваженъ. то въ другихъ обстоятельствахъ старанія его увѣнчались полнымъ успѣхомъ. Когда, нѣсколько лѣтъ тому назадъ, Россія бы вынуждена двинуть свои побѣдоносныя войска въ Среднюю Азію, всѣ умы въ Англіи встревожились; отовсюду послышались толки о приближеніи Русскихъ къ Остъ-Индіи и объ угрожающей ей, будто-бы, опасности. Возбужденіе было сильное, и буря политическихъ страстей грозила закипѣть. Но другъ России, сэръ Родерикъ, снова выступилъ ея защитникомъ, и спокойнымъ, безпристрастнымъ разъясненіемъ дѣла успѣлъ потушить волненіе.

Но съ такою любовью Мурчисонъ относился не къ однимъ высокимъ своимъ покровителямъ, не къ однимъ своимъ личнымъ друзьямъ: онъ питалъ ее ко всему Русскому народу, и сохранилъ это чувство къ нему до самой своей смерти. Радушное гостепріимство и безкорыстное содѣйствіе, которыя онъ нашелъ во всехъ классахъ общества, глубоко запечатлѣлись въ его памяти и навсегда осталось въ его душѣ чувство глубокой благодарности.

«Если мне придется указать на особенно-выдающуюся черту

— 352 —

въ Русскомъ народномъ характерѣ, говорить Мурчисонъ въ своемъ предисловіи къ «Geology of Russia», то это будетъ та твердая, неотступающая ни передъ какими препятствиями воля, которая на нетерпѣливое впередъ» путешественника всегда весело отвечала всепобѣждающимъ «можно!» Силою этого волшебнаго слова, Pyccкіe, и на Москвѣ-рекѣ, и на Невѣ, соорудили памятники, которые могутъ соперничать съ величайшими произведениями древности и новѣйшаго времени. Для такого народа не существуетъ дѣйствительныхъ затрудненій. Проваливался ли мостъ — чрезъ нѣсколько времени, какъ бы по волшебству, возникалъ на его мѣстѣ новый. Натыкались ли путешественники на почти безводную рѣчку — она на ихъ глазахъ, какъ бы сверхъестественною силою, дѣлалась судоходною, и они могли спускаться по ней въ лодкахъ. Тамъ, где не было имъ возможности плыть — сильные молодцы, съ веселою пѣснею, переносили лодки на плечахъ чрезъ мели и пороги. Въ мокроту и сушь, въ зной и въ стужу никогда не было слышно ропота на ихъ устахъ, а на все былъ одинъ ответь: «можно!» «Славному Повелителю великаго царства, заключаетъ *Мурчисонъ,* строение котораго мы старались описать въ нашей книге, и темь изъ его верноподданныхъ, съ которыми приходилось намъ иметь, дело, приносимъ мы дань искренней нашей преданности и непоколебимой, вечной признательности.»

«Славному Повелителю великаго царства, заключаетъ *Мурчисонъ,* строеше котораго мы старались описать въ нашей книге, и темь изъ его верноподданныхъ, съ которыми приходилось намъ иметь, дело, приносимъ мы дань искренней нашей преданности и непоколебимой, вечной признательности.»

Если ко всему сказанному нами присовокупимъ, что сэръ Родерикъ состоялъ не только дѣйствительнымъ членомъ нашей Академіи, но и почетнымъ членомъ Русскаго Географическая Общества, подобно Гумбольдту и Карлу Риттеру, и находился въ постоянныхъ сношеніяхъ съ обоими названными учрежденіями, то всякому будетъ очевидно, что мы имели полное право считать его своимъ болѣе, чѣмъ кого-либо другаго изъ дѣятелей науки, живущихъ внѣ русскихъ предѣловъ.

Такимъ образомъ, съ глубокою, сердечною благодарностью, скажемъ объ этомъ человѣкѣ, столь много потрудившемся на пользу Россіи: миръ его праху, честь его памяти!
